# Supplementary material for: The utilization of a stable 2D bilayer MOF for simultaneous study of luminescent and photocatalytic properties: experimental studies and theoretical analysis
Source: Royal Society of Chemistry journal article supplement (doi:10.1039/c8ra04145h), 2018-01-01
Supplement: c8ra04145h1.pdf [file c8ra04145h1.pdf]

## The utilization of a stable 2D bilayer MOF on luminescent and photocatalytic properties simultaneously: experimental studies and theoretical analysis

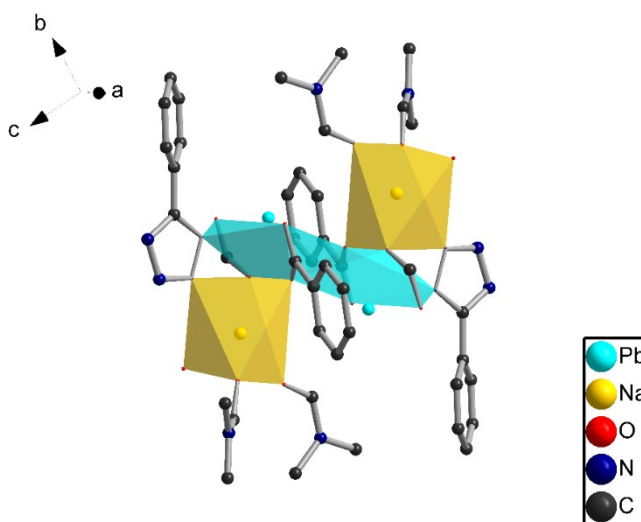

Fig. S1 view of the 4-connected cluster.

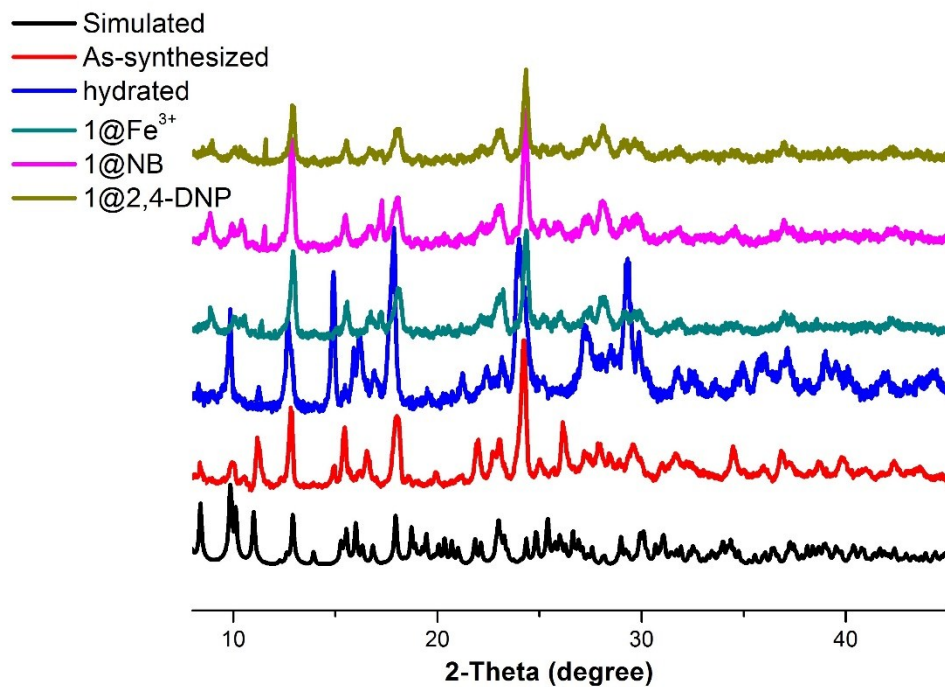

Fig. S2 view of the PXRD patterns of different systems.

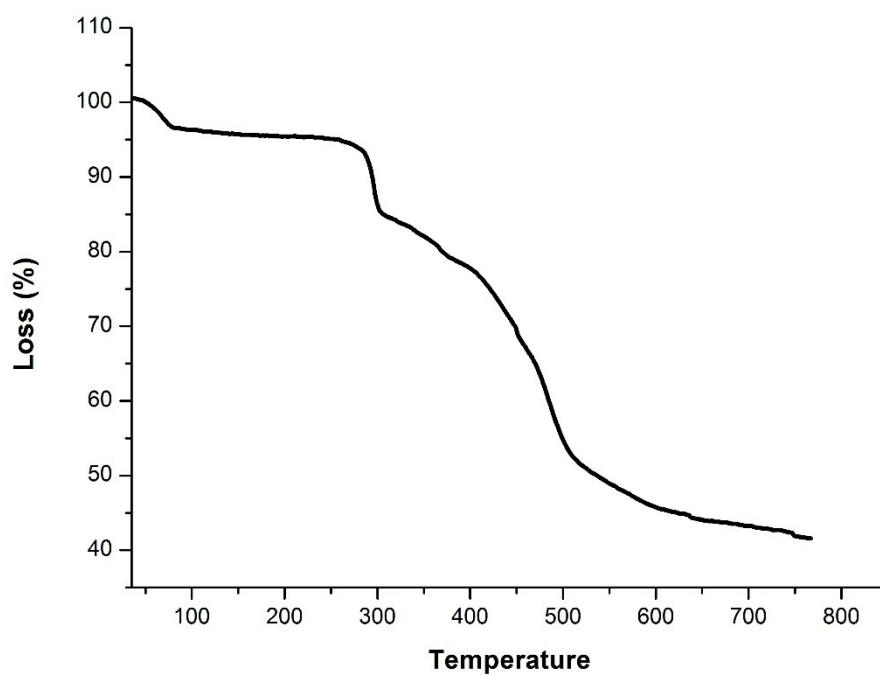

Fig. S3 view of the TGA

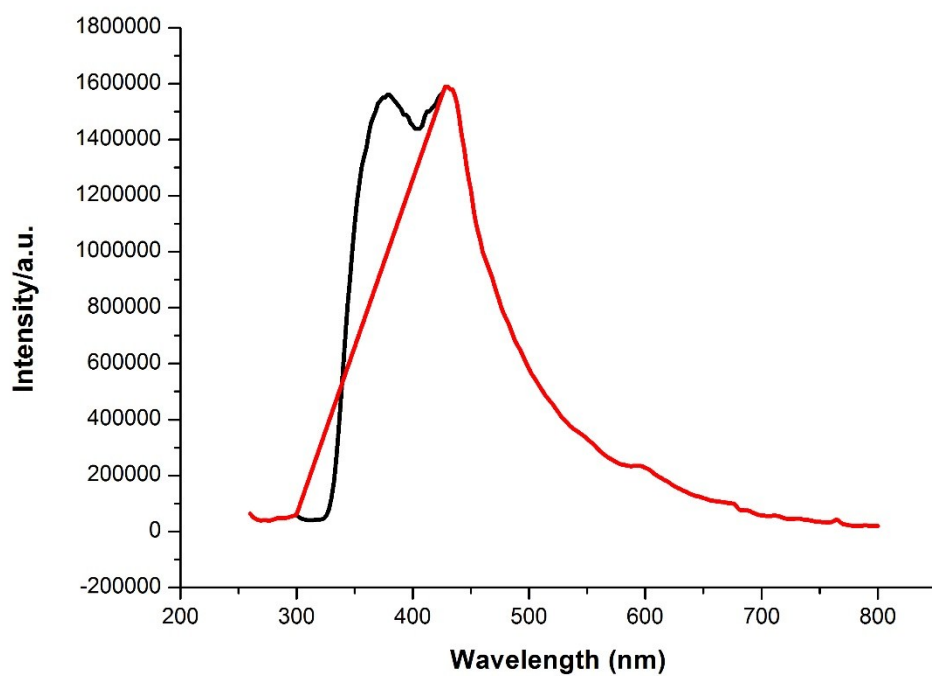

Fig. S4 Solid state excitation (red,  $\lambda_{em} = 415$  nm) and emission (black,  $\lambda_{ex} = 335$  nm) spectrum of H<sub>3</sub>TZBPDC.

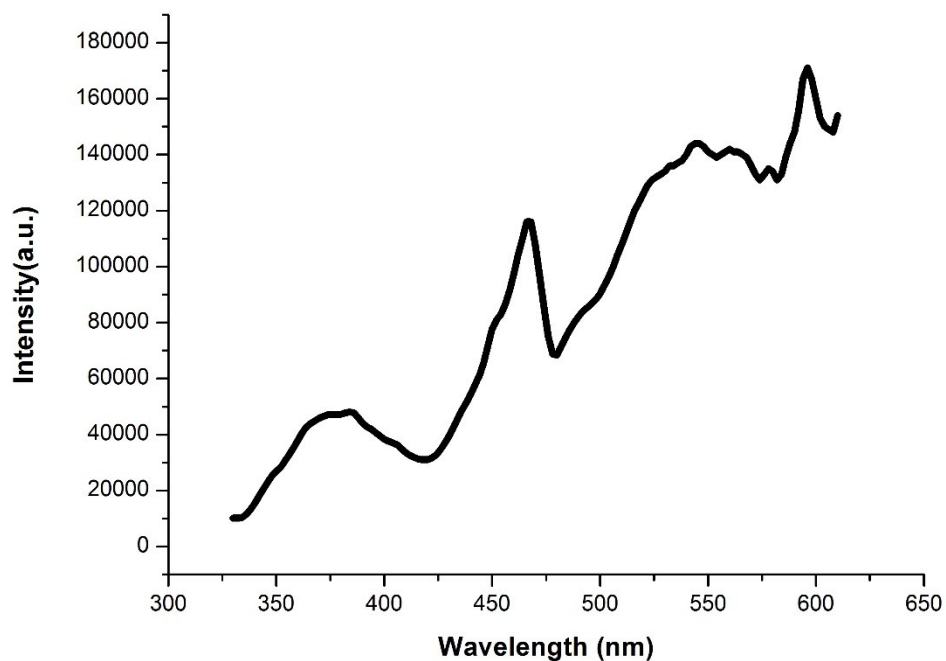

Fig. S5 Solid state excitation spectrum of **1** ( $\lambda_{\text{ex}} = 310 \text{ nm}$ ).

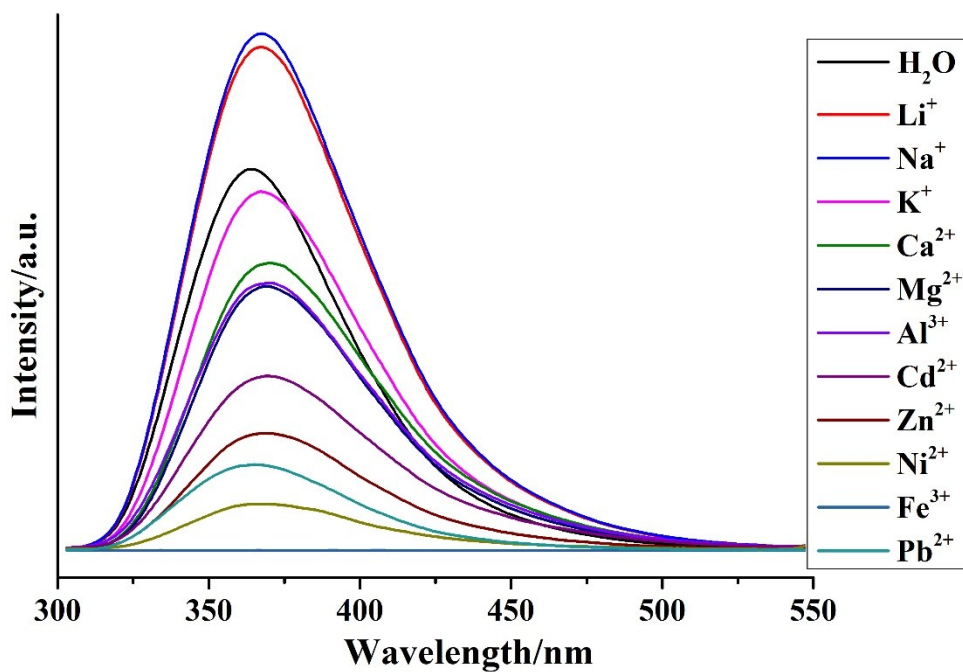

Fig. S6 The photoluminescence intensities spectra of **1** that was dispersed in the solutions of different metal ions.

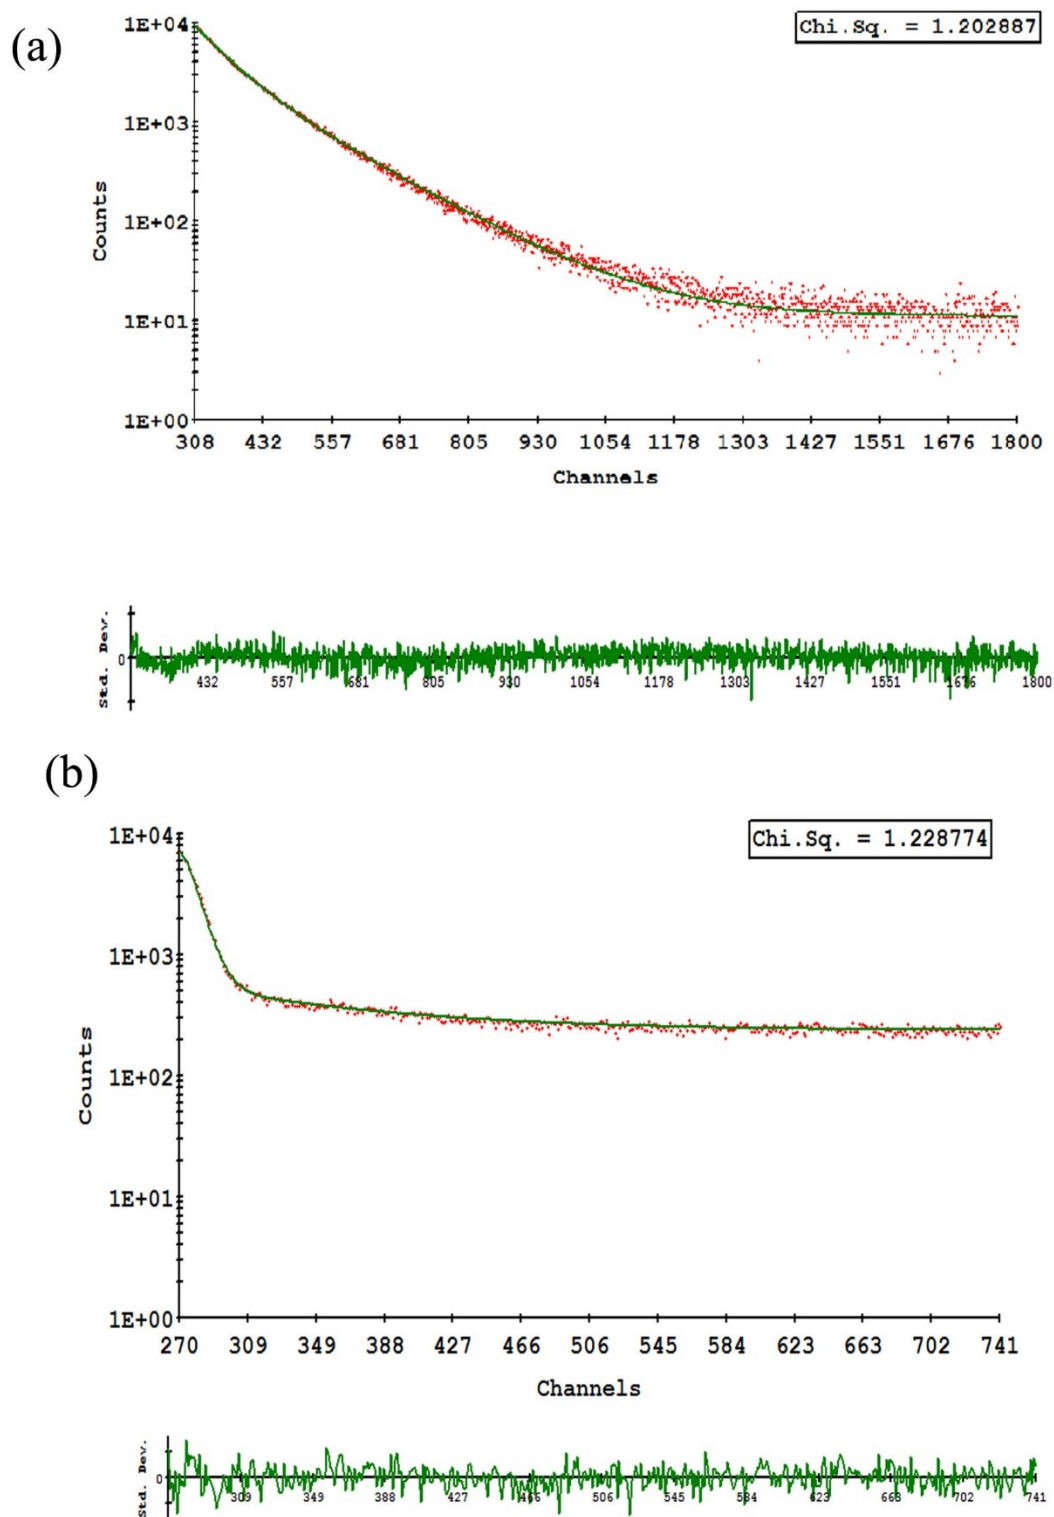

Fig. S7 Comparison of the fluorescence lifetime of **1** (a) and Fe<sup>3+</sup>@ **1** (b).

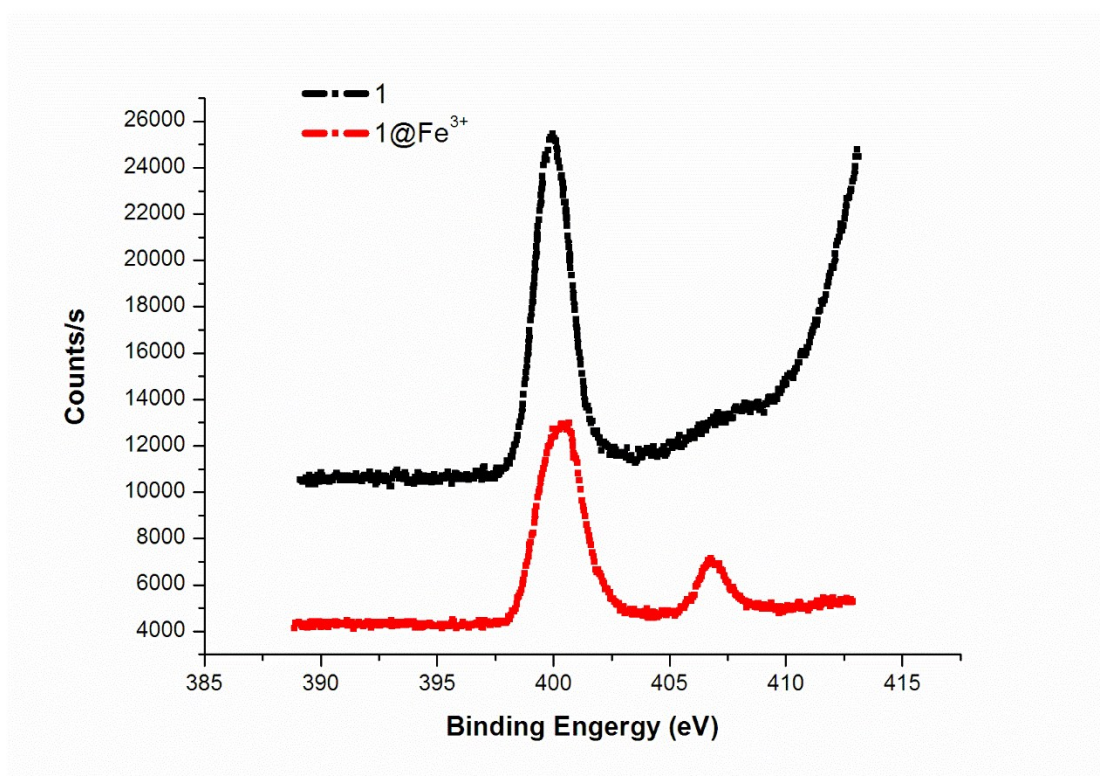

Fig. S8 The N1s XPS spectra of the **1** (black) and **1@Fe<sup>3+</sup>** (red).

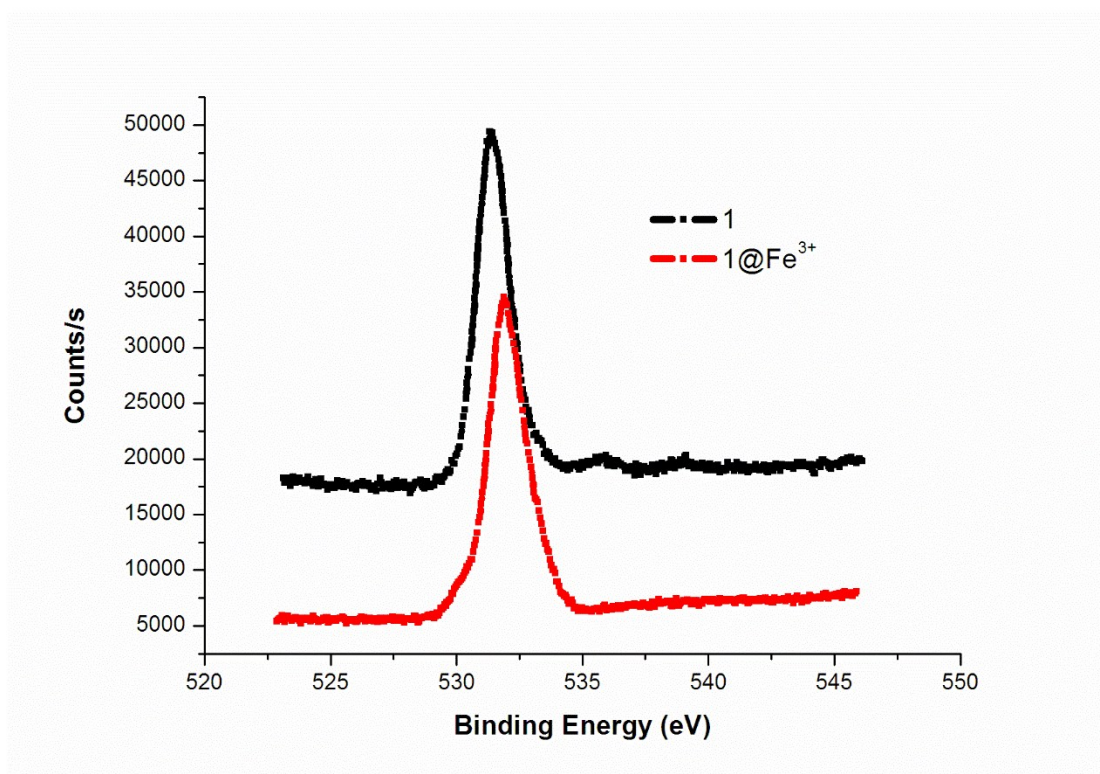

Fig. S9 The O1s XPS spectra of the **1** (black) and **1@Fe<sup>3+</sup>** (red).

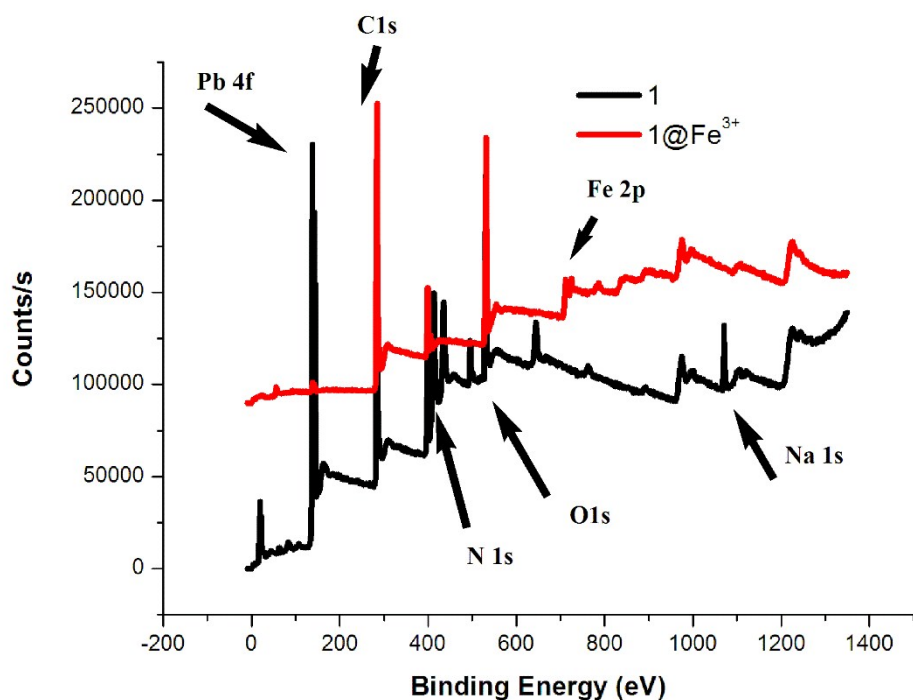

Fig. S10 The XPS spectra of the **1@Fe<sup>3+</sup>** (red) and **1** (black).

### IR spectra

**1** was determined in the frequency range of 500–4000  $\text{cm}^{-1}$ , as shown in Fig. S11. **1** shows broad bands in the 3500–3100  $\text{cm}^{-1}$  region, which may be ascribed to –OH stretching vibrations of the lattice or coordinated water molecules. The strong peaks at 1615 and 1243  $\text{cm}^{-1}$  may be attributed to the asymmetric and symmetric vibrations of carboxyl groups. The strong peaks at 1551, 1498, 1435, 1326  $\text{cm}^{-1}$  for **1**, suggest the  $\nu_{\text{C-N}}$  stretching vibrations of the triazole rings of the TZBPDC.

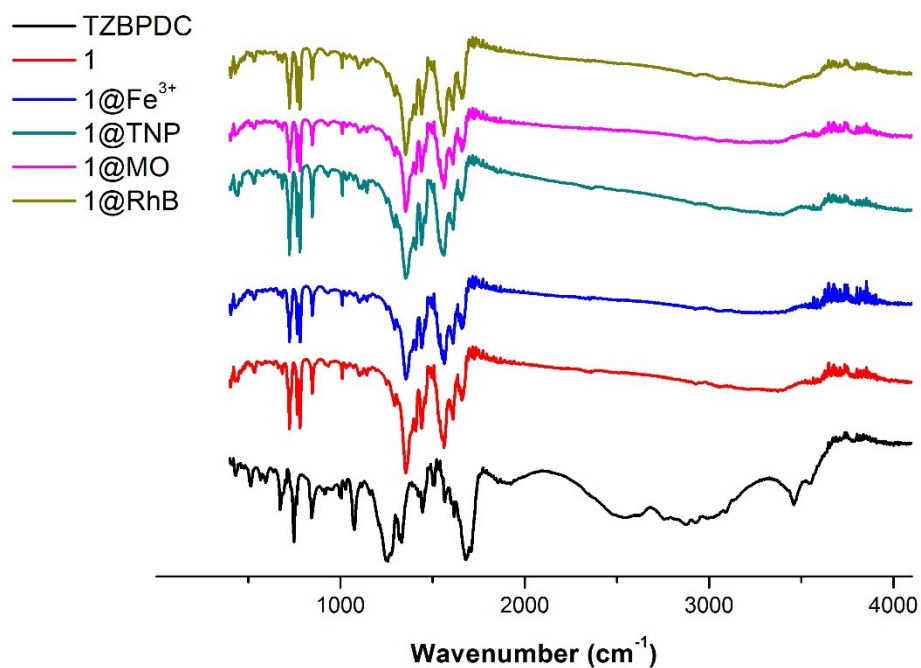

Fig. S11 The IR spectra of **1**, H<sub>2</sub>L, **1**@Fe<sup>3+</sup>, **1**@ACs (ACs = nitro-aromatic and aromatic compounds) and the samples after degradation of dyes.

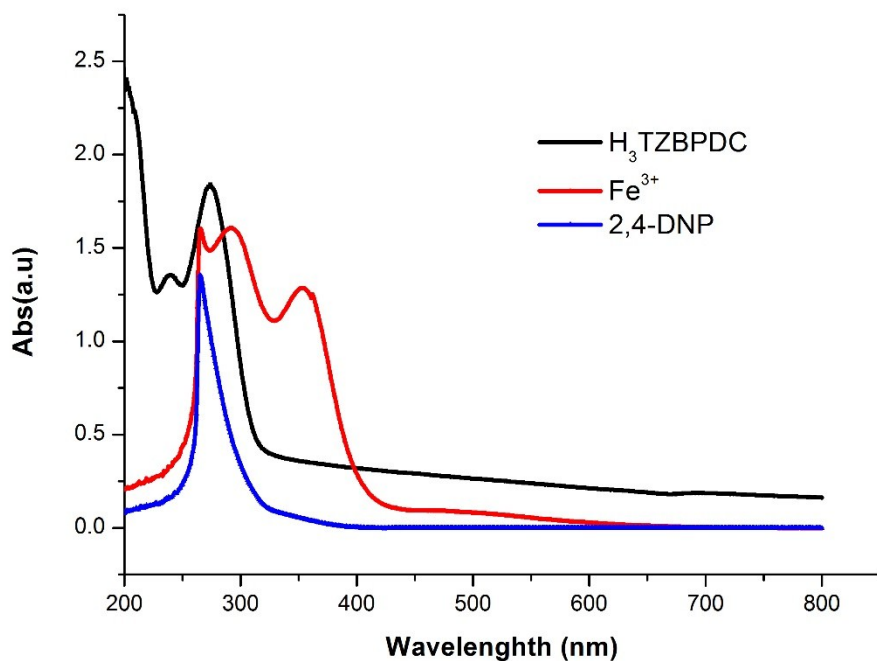

Fig. S12 view of spectra of the UV-vis for different analytes, **1** and ligand.

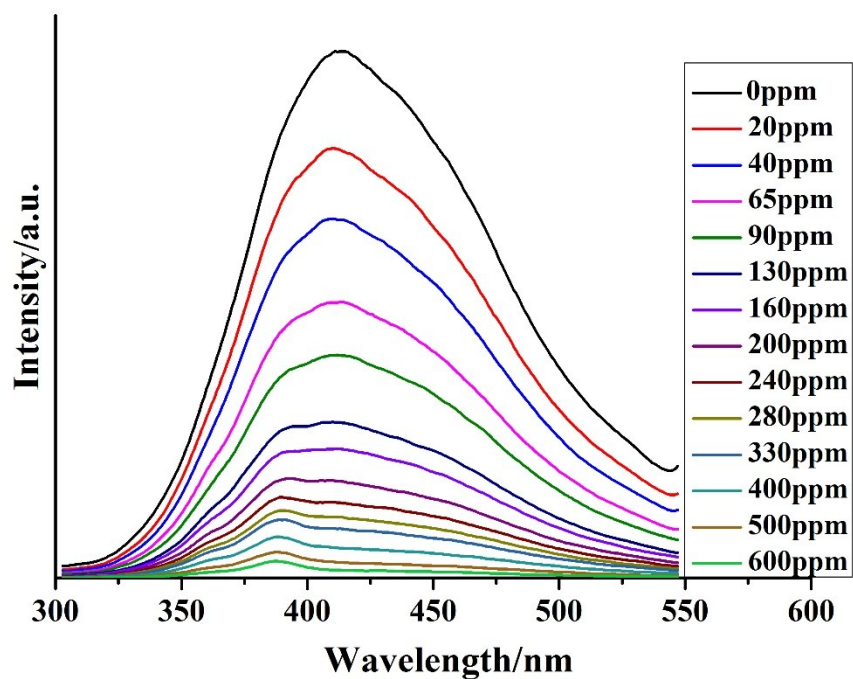

Fig. S13 Luminescent quenching of **1** dispersed in ethanol by the gradual addition of 1 mM solution of 1,3-DNB in DMF.

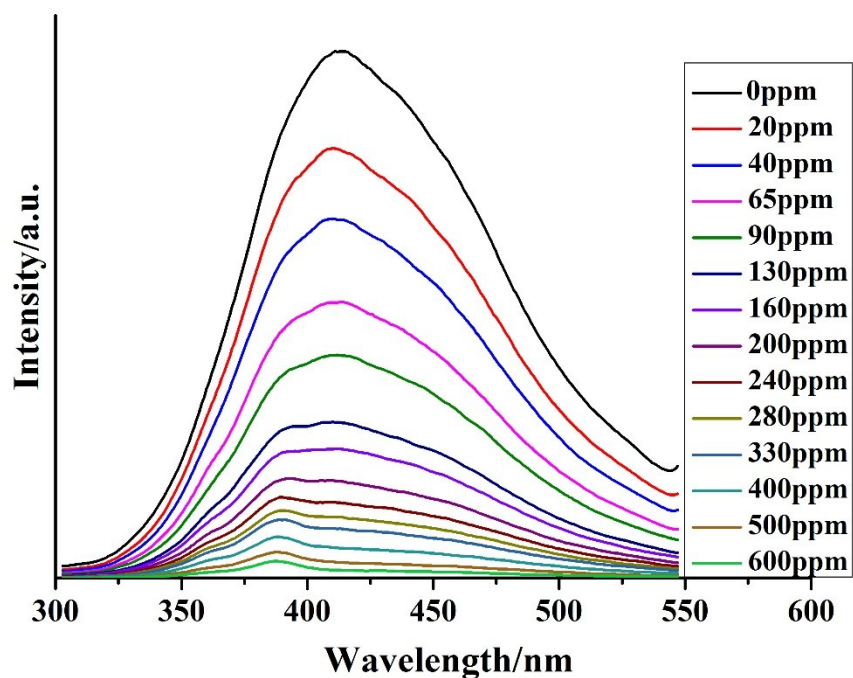

Fig. S14 The Stern–Volmer plot of **1** against 1,3-DNB.



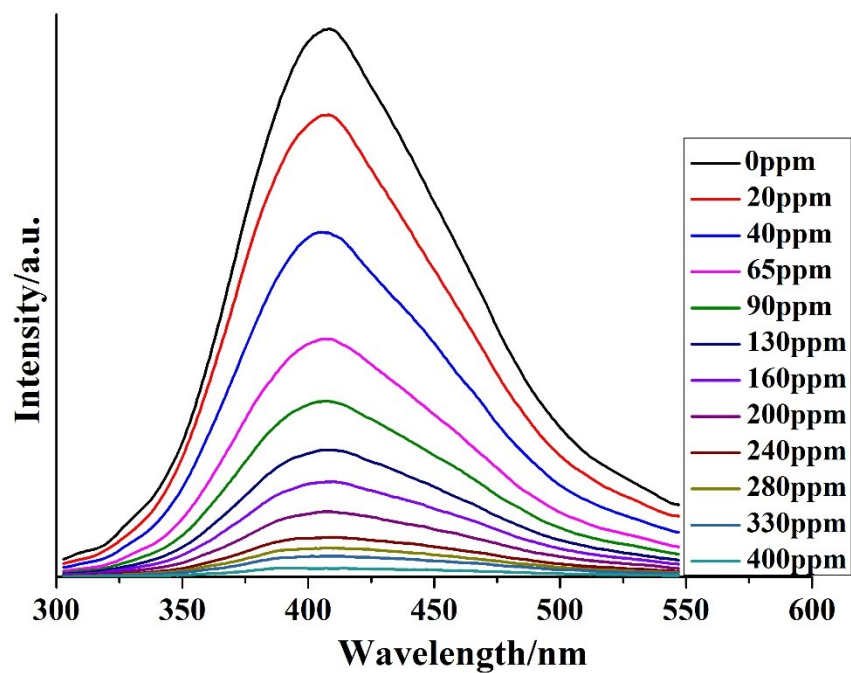

Fig. S15 Luminescent quenching of **1** dispersed in ethanol by the gradual addition of 1 mM solution of 2,4-DNT in DMF.

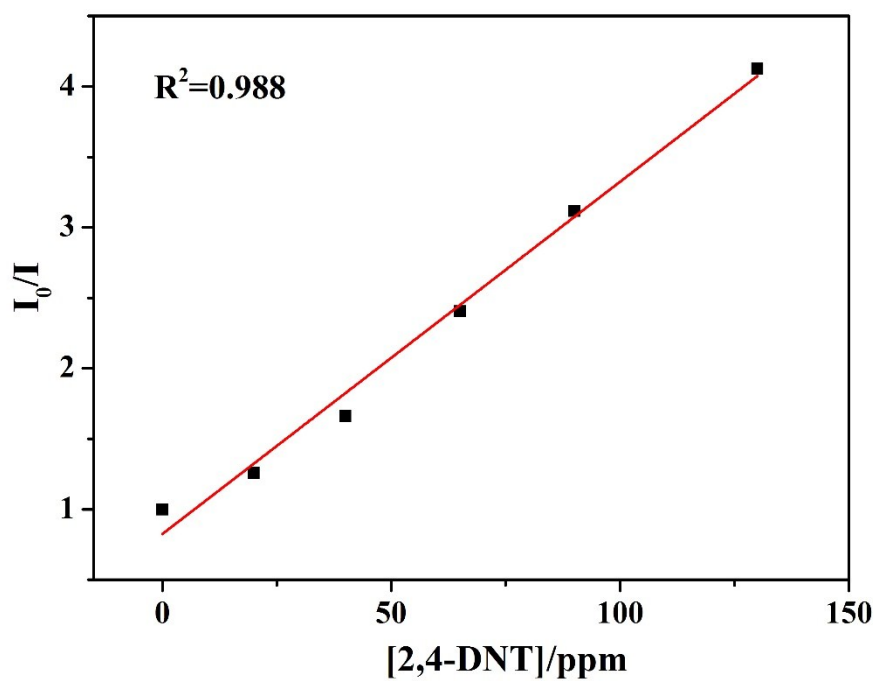

Fig. S16 Stern-Volmer plot for the fluorescence quenching of **1** upon the addition of 2,4-DNT.

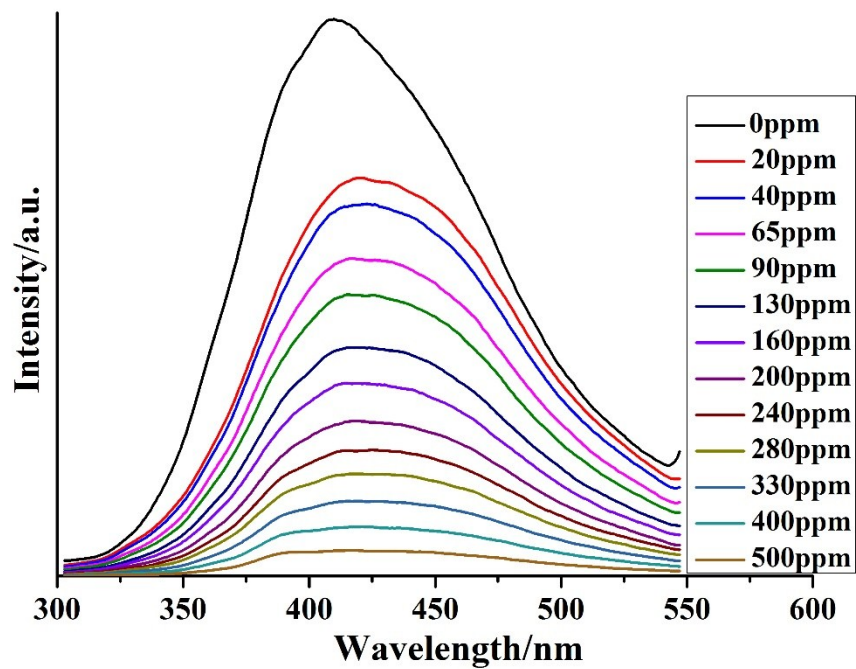

Fig. S17 Luminescent quenching of **1** dispersed in ethanol by the gradual addition of 1 mM solution of 2,6-DNT in DMF.

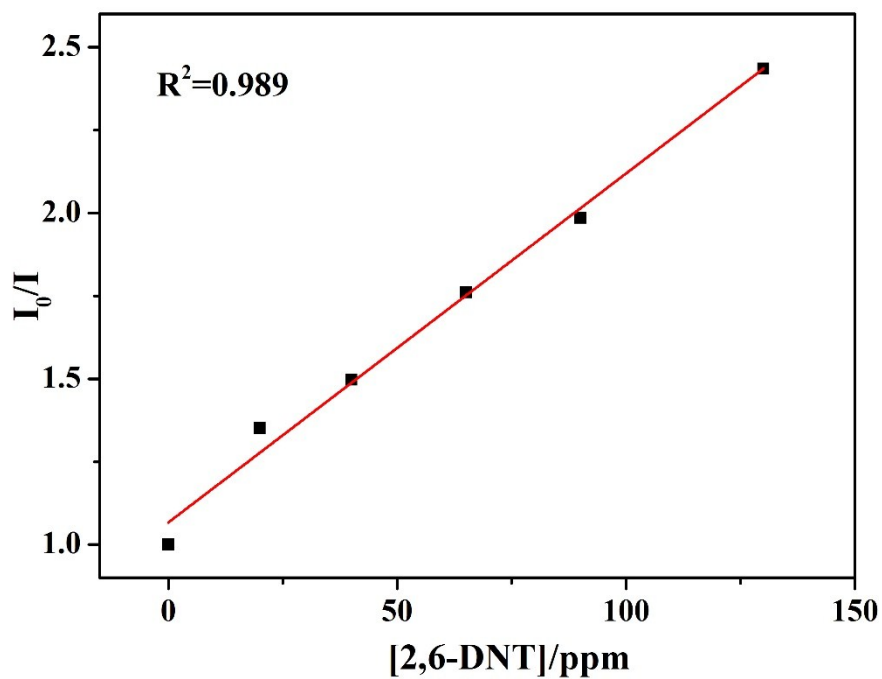

Fig. S18 Stern–Volmer plot for the fluorescence quenching of **1** upon the addition of 2,6-DNT.

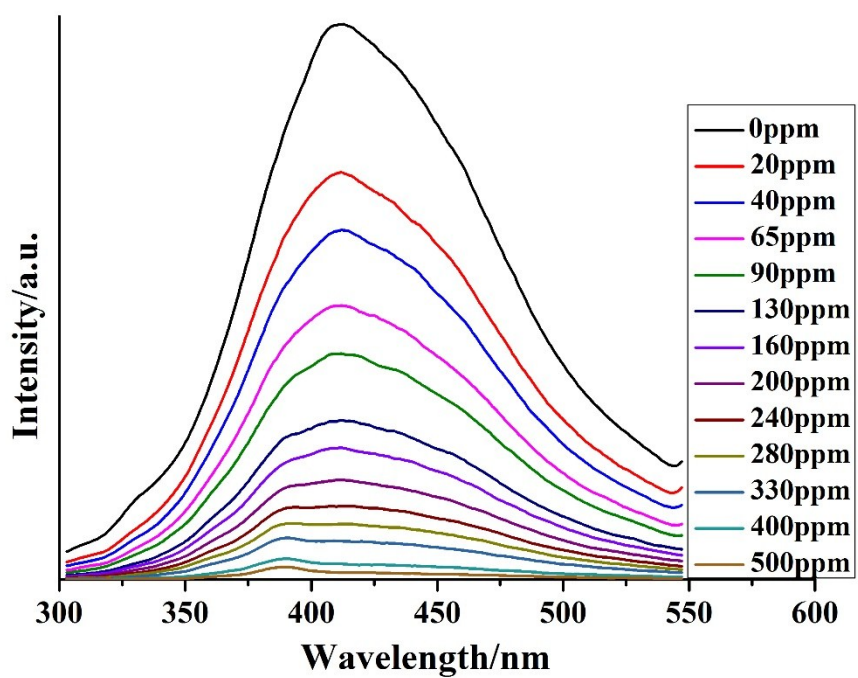

Fig. S19 Luminescent quenching of **1** dispersed in ethanol by the gradual addition of 1 mM solution of 2-NT in DMF.

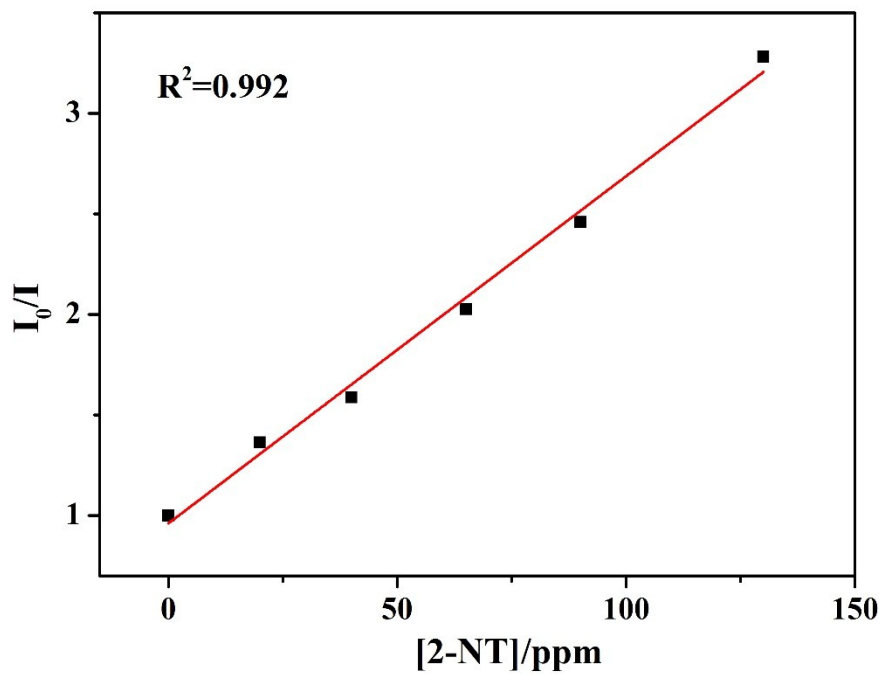

Fig. S20 Stern-Volmer plot for the fluorescence quenching of **1** upon the addition of 2-NT.

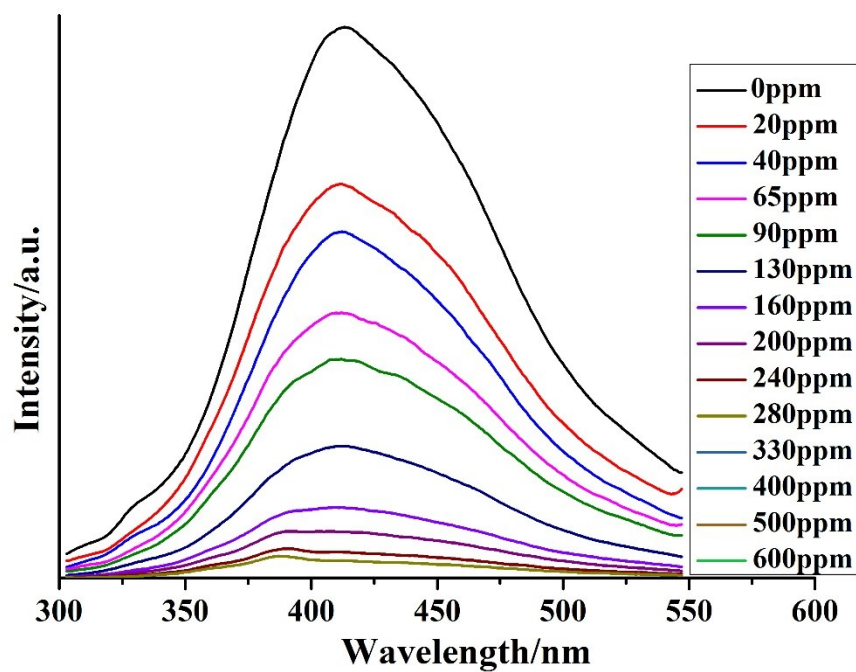

Fig. S21 Luminescent quenching of **1** dispersed in ethanol by the gradual addition of 1 mM solution of 4-NT in DMF.

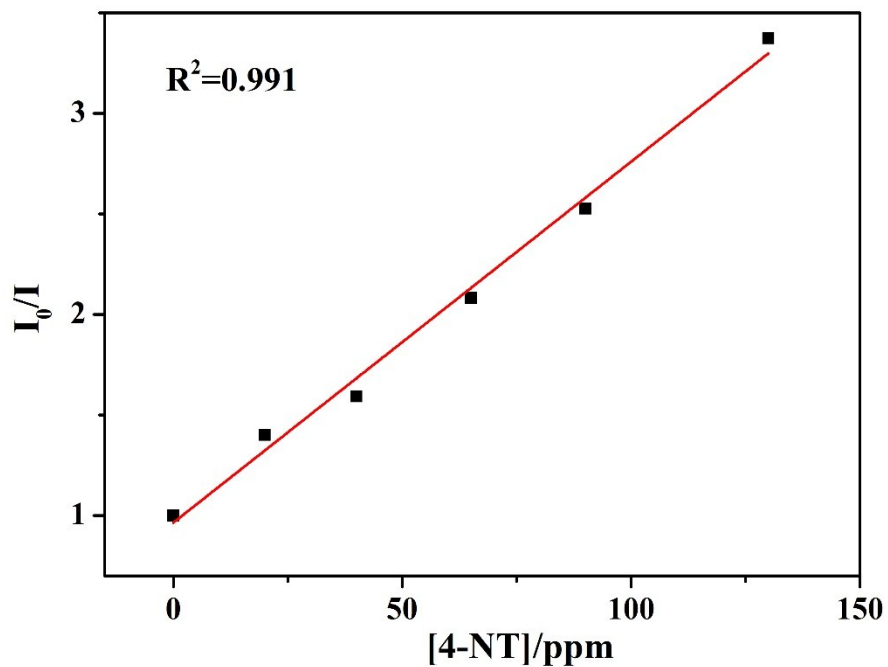

Fig. S22 Stern-Volmer plot for the fluorescence quenching of **1** upon the addition of 4-NT.

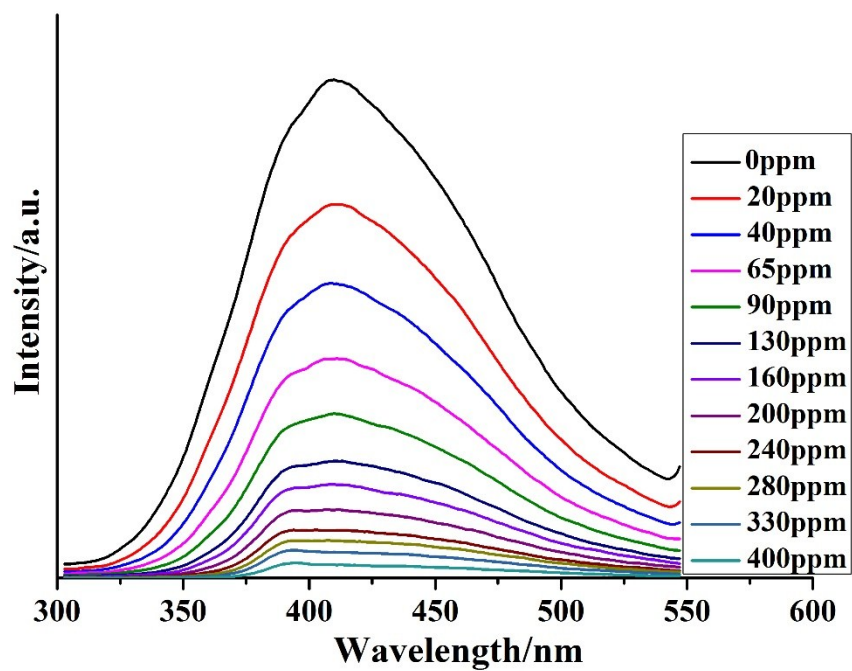

Fig. S23 Luminescent quenching of **1** dispersed in ethanol by the gradual addition of 1 mM solution of MNP in DMF.

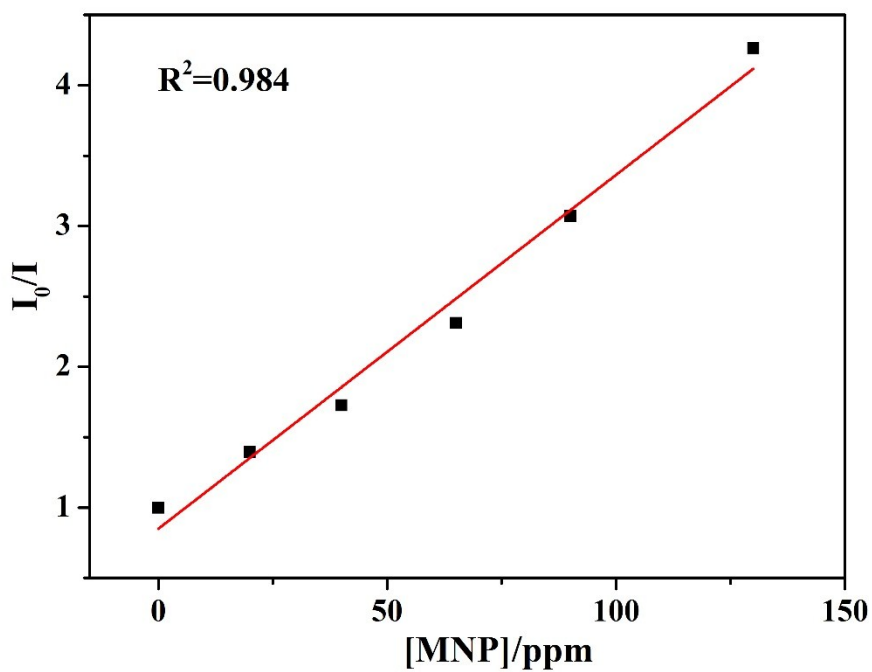

Fig. S24 Stern-Volmer plot for the fluorescence quenching of **1** upon the addition of MNP.

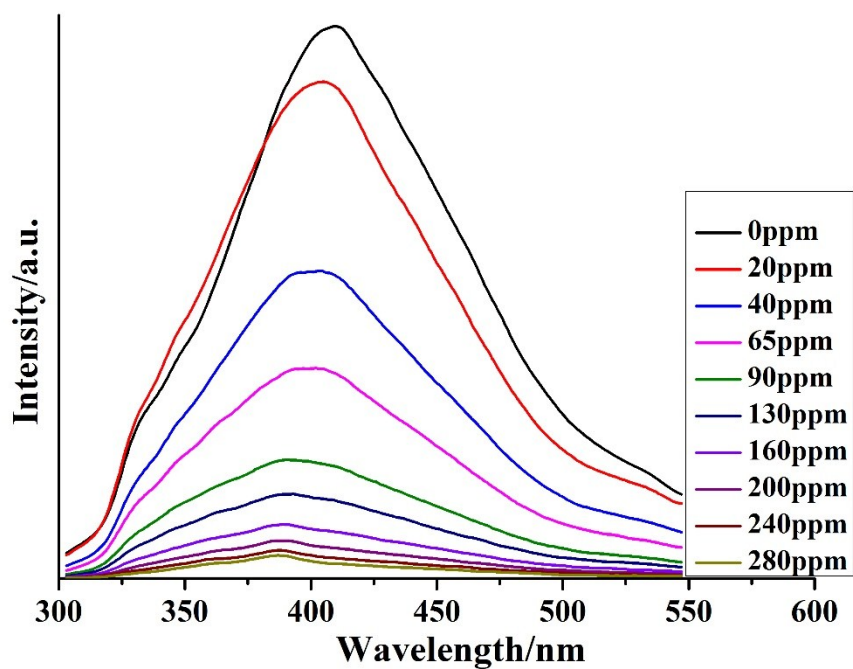

Fig. S25 Luminescent quenching of **1** dispersed in ethanol by the gradual addition of 1 mM solution of NB in DMF.

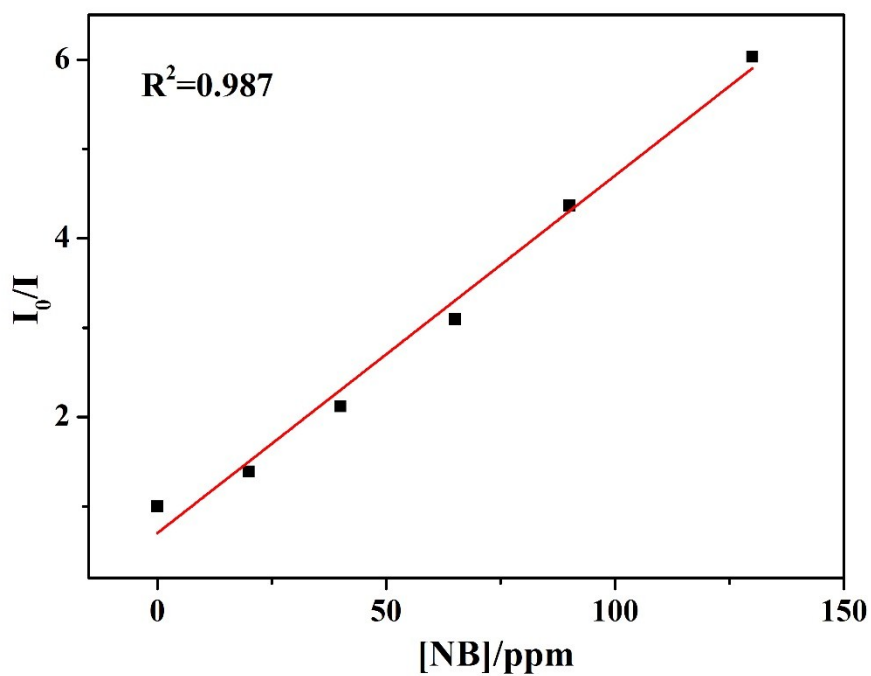

Fig. S26 Stern–Volmer plot for the fluorescence quenching of **1** upon the addition of NB.

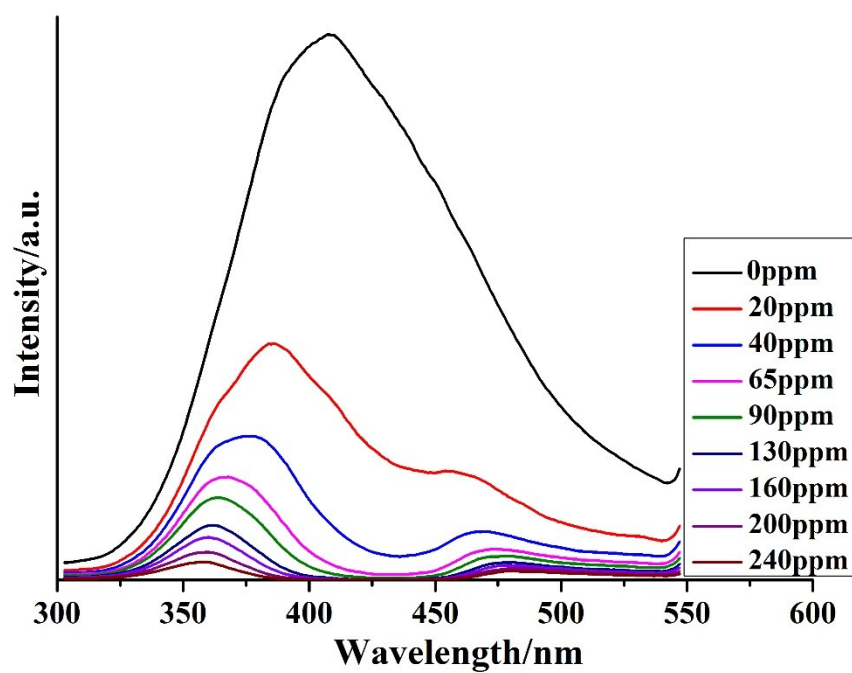

Fig. S27 Luminescent quenching of **1** dispersed in ethanol by the gradual addition of 1 mM solution of PNP in DMF.

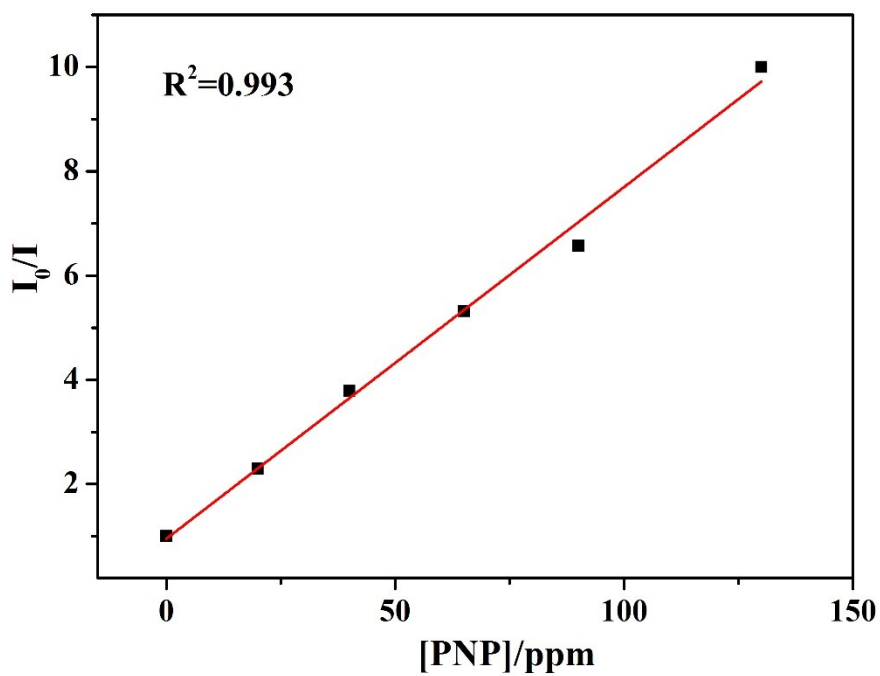

Fig. S28 Stern-Volmer plot for the fluorescence quenching of **1** upon the addition of PNP.

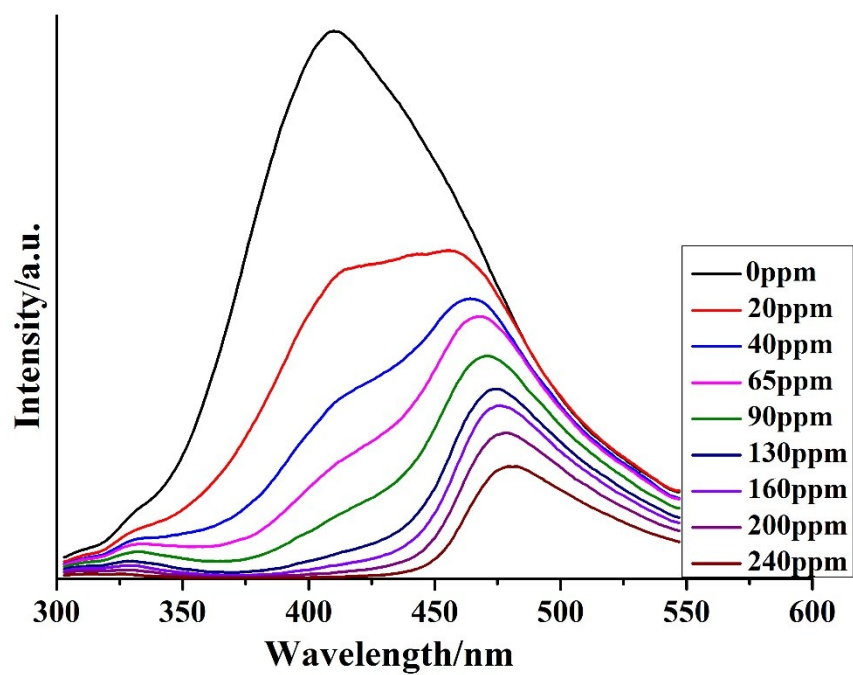

Fig. S29 Luminescent quenching of **1** dispersed in ethanol by the gradual addition of 1 mM solution of TNP in DMF.

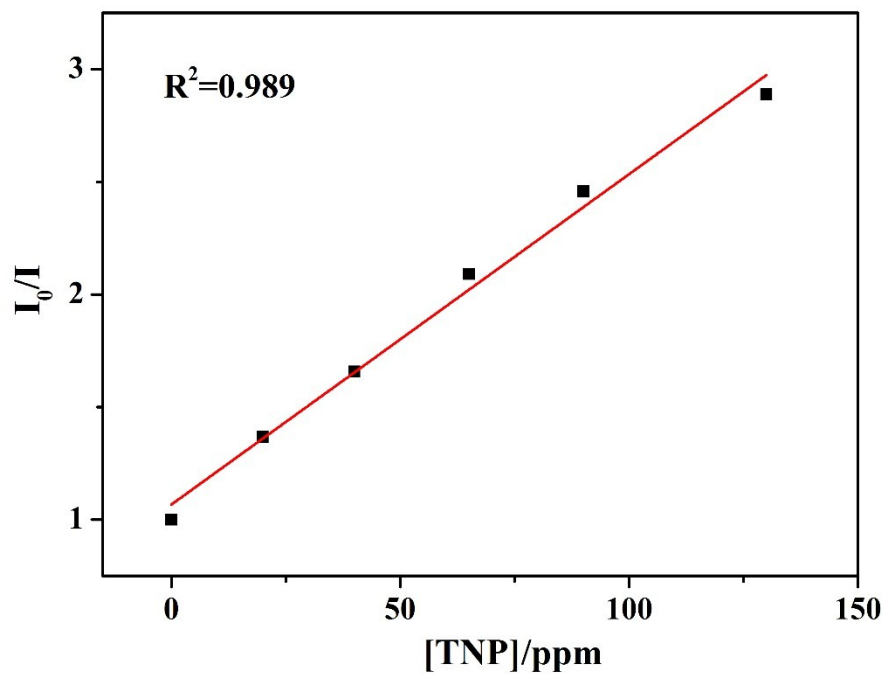

Fig. S30 Stern-Volmer plot for the fluorescence quenching of **1** upon the addition of TNP.



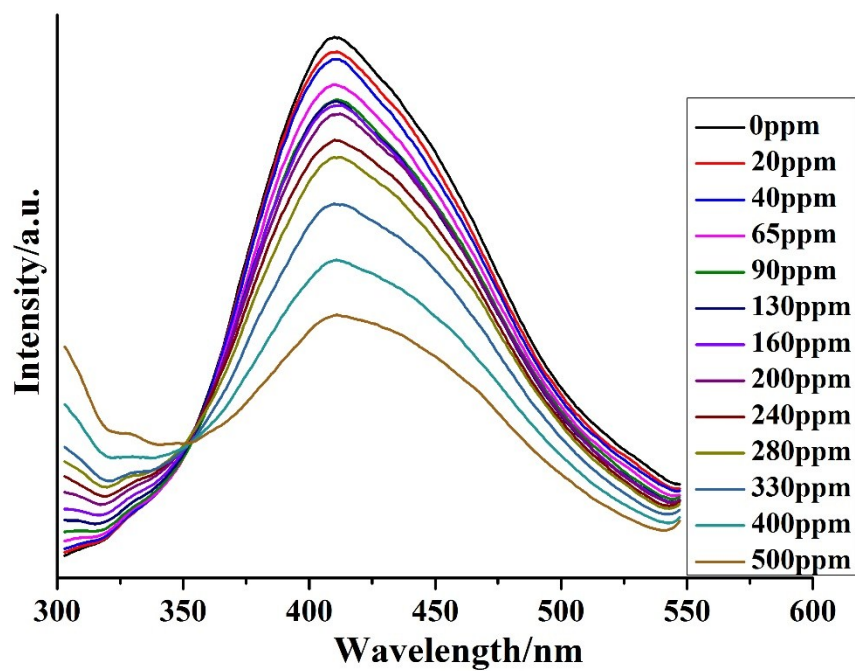

Fig. S31 Luminescent quenching of **1** dispersed in ethanol by the gradual addition of 1 mM solution of 1,2,4-TMB in DMF.

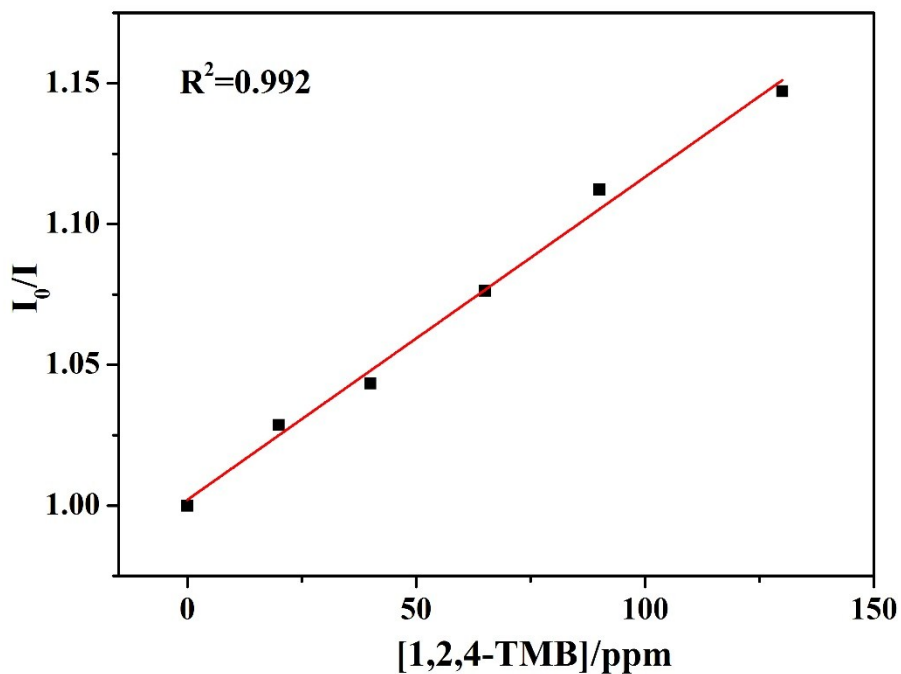

Fig. S32 Stern–Volmer plot for the fluorescence quenching of **1** upon the addition of 1,2,4-TMB.

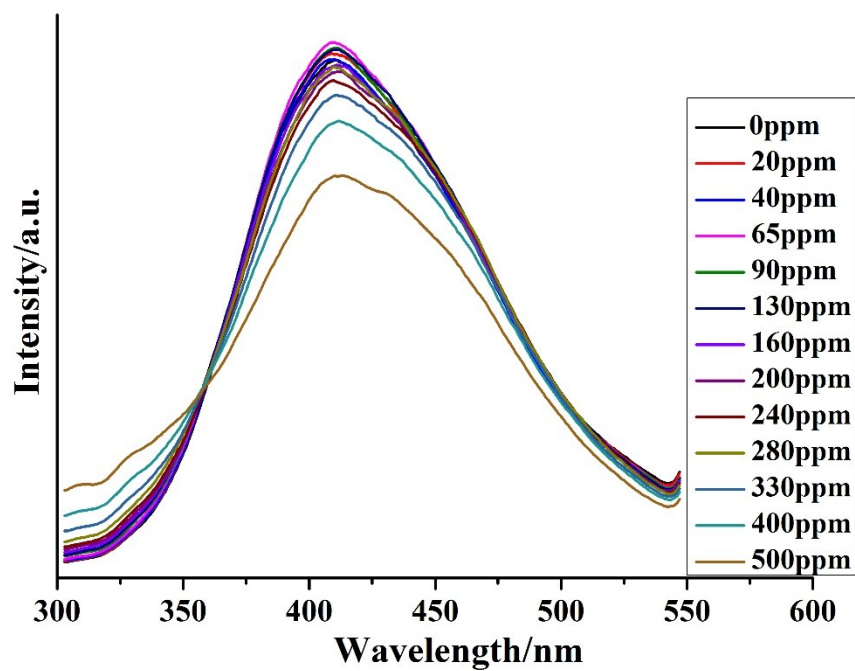

Fig. S33 Luminescent quenching of **1** dispersed in ethanol by the gradual addition of 1 mM solution of 1,3,5-TMB in DMF.

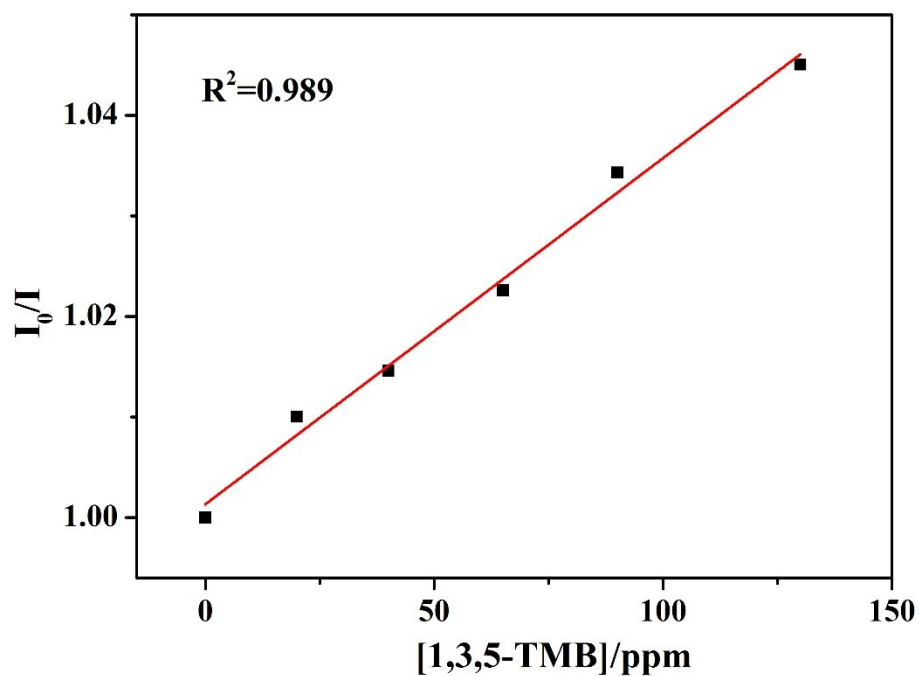

Fig. S34 Stern-Volmer plot for the fluorescence quenching of **1** upon the addition of 1,3,5-TMB.

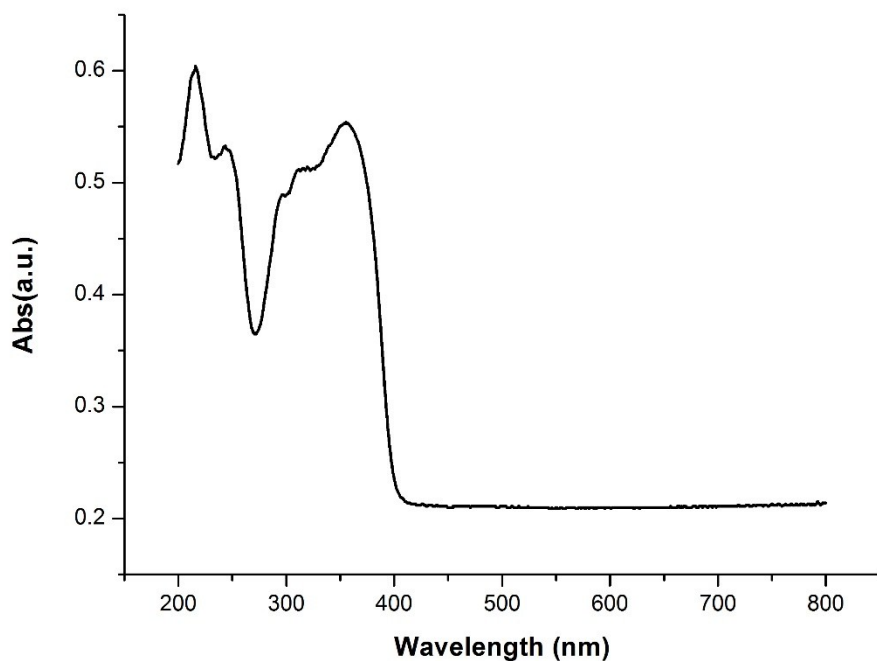

Fig. S35 UV-vis diffuse-reflectance spectra of **1** with BaSO<sub>4</sub> as background.

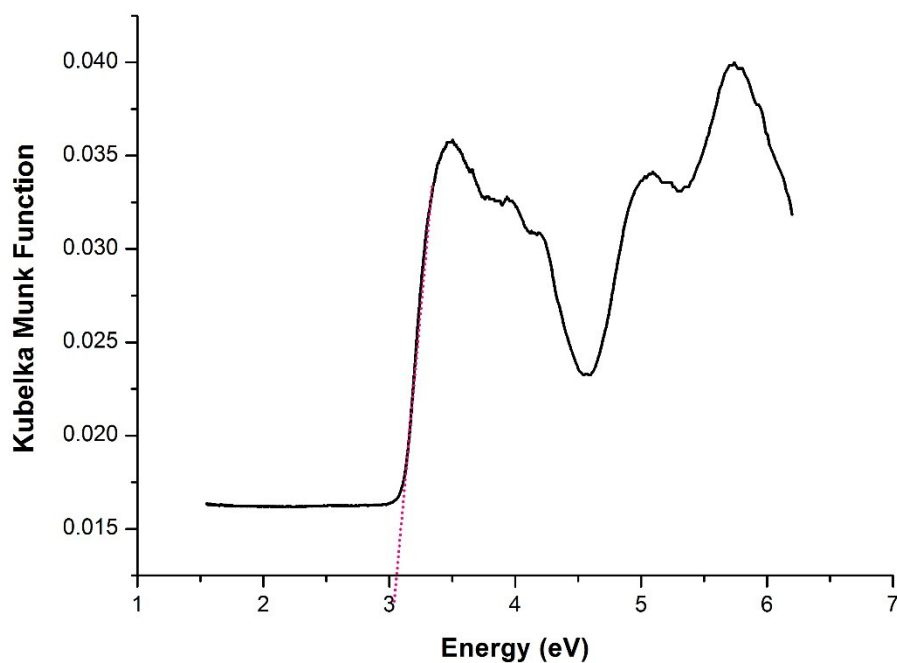

Fig. S36 Solid-state optical diffuse-reflection spectra of **1** derived from diffuse reflectance data at ambient temperature. The intercept of the extrapolated absorption edge on the energy scale (x axis) gives the band gap of the sample.

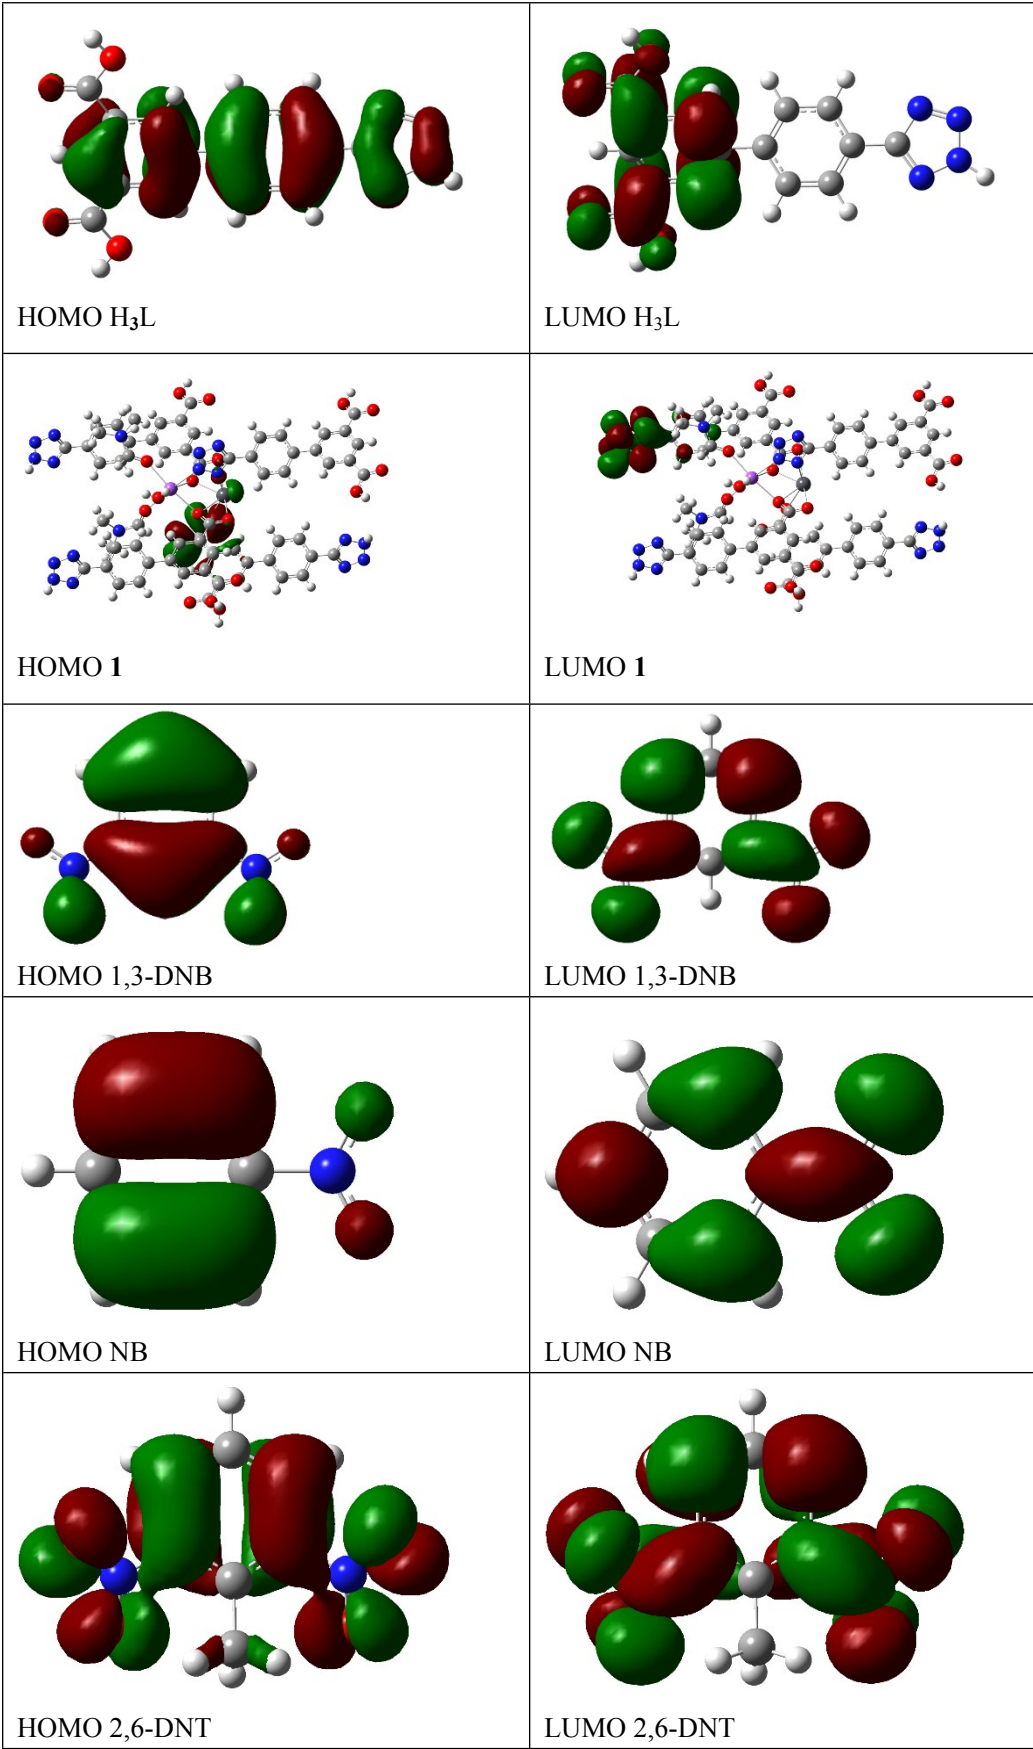

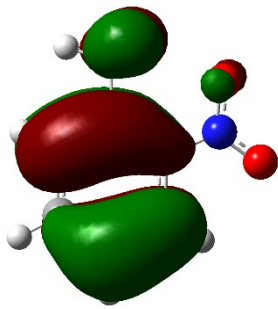

HOMO 2-NT

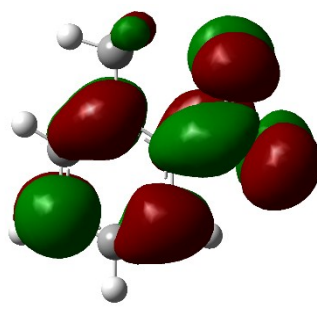

LUMO 2-NT

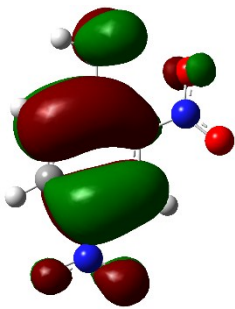

HOMO 2,4-DNT

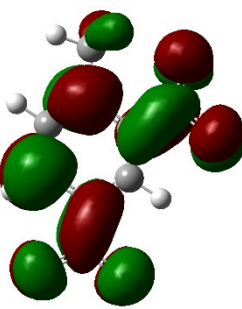

LUMO 2,4-DNT

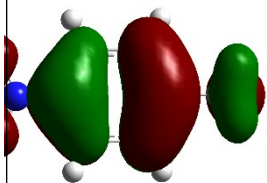

HOMO 4-NT

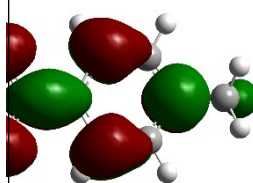

LUMO 4-NT

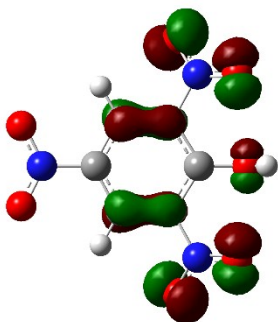

HOMO TNP

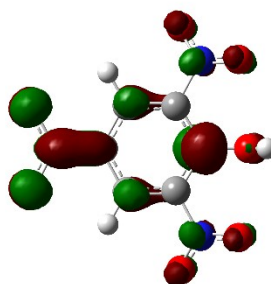

LUMO TNP

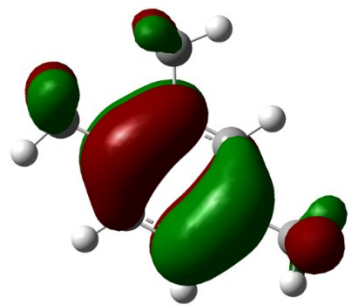

HOMO 1,2,4-TMB

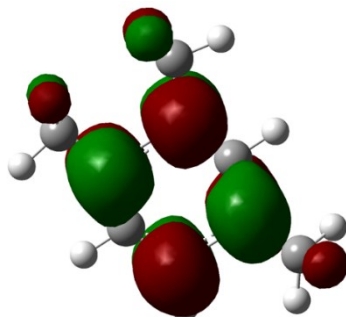

LUMO 1,2,4-TMB

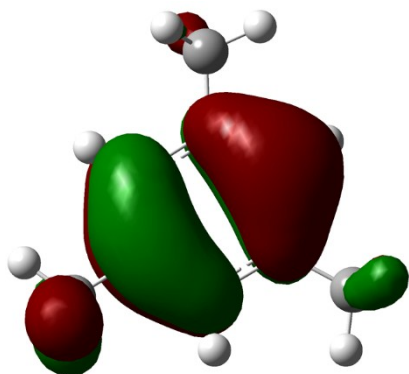

HOMO 1,3,5-TMB

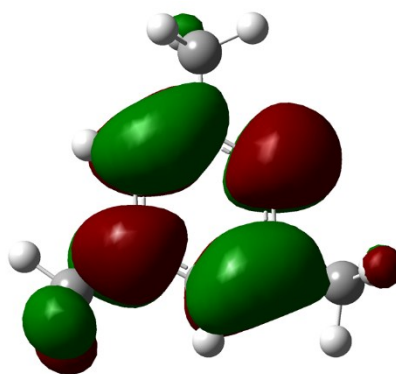

LUMO 1,3,5-TMB

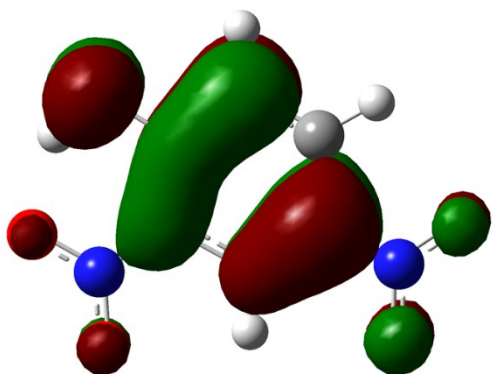

HOMO 2,4-DNP

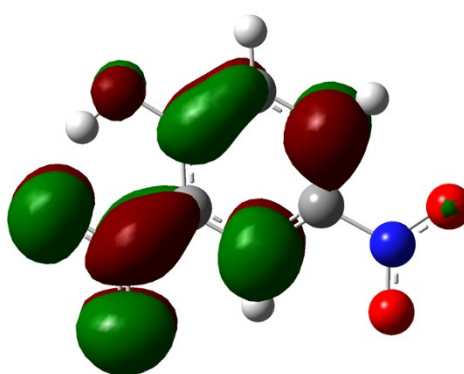

LUMO 2,4-DNP

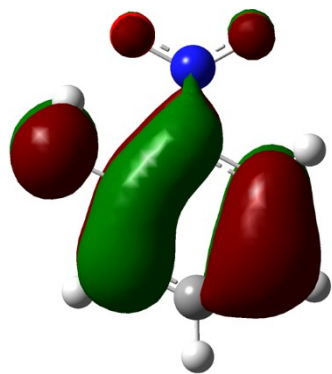

HOMO o-nitro phenol

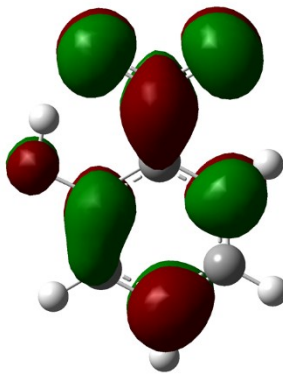

LUMO o-nitro phenol

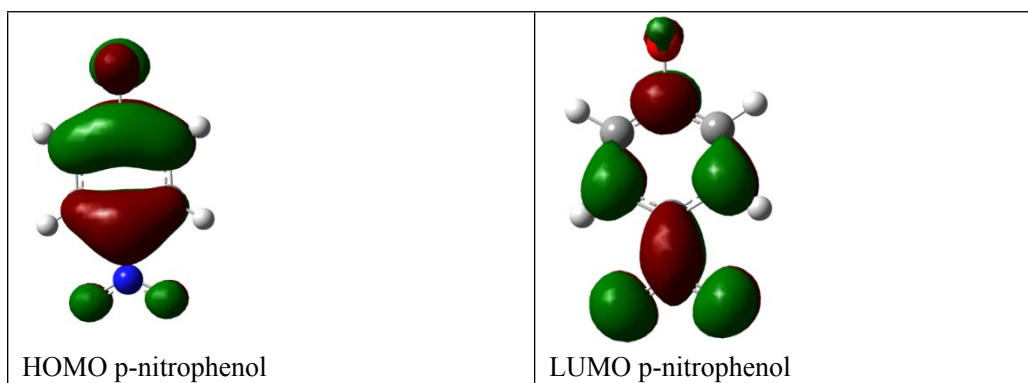

Fig. S37 HOMO–LUMO energies of the NACs along with CP **1** and H<sub>3</sub>L.

**Table S1.** Crystal data and structure refinement information for **1**

| Compound                                                                              | <b>1</b>                                                           |
|---------------------------------------------------------------------------------------|--------------------------------------------------------------------|
| Formula                                                                               | C <sub>21</sub> H <sub>23</sub> N <sub>6</sub> NaO <sub>7</sub> Pb |
| Crystal system                                                                        | triclinic                                                          |
| Space group                                                                           | <i>P</i> -1                                                        |
| Crystal color                                                                         | colorless                                                          |
| <i>a</i> , [Å]                                                                        | 10.0155(3)                                                         |
| <i>b</i> , [Å]                                                                        | 11.6906(3)                                                         |
| <i>c</i> , [Å]                                                                        | 11.8211(4)                                                         |
| $\alpha$ , [°]                                                                        | 97.673(2)                                                          |
| $\beta$ , [°]                                                                         | 99.525(1)                                                          |
| $\gamma$ , [°]                                                                        | 112.778(1)                                                         |
| <i>V</i> , Å <sup>3</sup>                                                             | 1228.49(6)                                                         |
| <i>Z</i>                                                                              | 2                                                                  |
| $\rho_{\text{calcd}}$ , g/cm <sup>3</sup>                                             | 1.897                                                              |
| $\mu$ , mm <sup>-1</sup>                                                              | 6.938                                                              |
| <i>F</i> (000)                                                                        | 680                                                                |
| $\theta$ Range, deg                                                                   | 2.27–26.12                                                         |
| Reflection collected                                                                  | 18120/ 0.0671                                                      |
| Goodness-of-fit on <i>F</i> <sup>2</sup>                                              | 1.012                                                              |
| <i>R</i> <sub>1</sub> , <i>wR</i> <sub>2</sub> ( <i>I</i> > 2 $\sigma$ ( <i>I</i> ))* | 0.0352, 0.0643                                                     |

|                          |                |
|--------------------------|----------------|
| $R_1, wR_2$ (all data)** | 0.0539, 0.0694 |
|--------------------------|----------------|

\*  $R = \sum(F_o - F_c) / \sum(F_o)$ , \*\*  $wR_2 = \{\sum[w(F_o^2 - F_c^2)^2] / \sum(F_o^2)^2\}^{1/2}$ .

**Table S2.** Selected bond distances (Å) and angles (°) of **1**

| <b>1</b>        |            |                  |            |
|-----------------|------------|------------------|------------|
| Pb(1)-O(4)      | 2.361(4)   | Pb(1)-O(1)#1     | 2.400(3)   |
| Pb(1)-N(1)      | 2.418(5)   | Pb(1)-O(2)       | 2.613(3)   |
| Pb(1)-O(3)      | 2.648(4)   | Na(1)-O(1W)      | 2.327(5)   |
| Na(1)-O(6)      | 2.381(7)   | Na(1)-O(5)       | 2.406(7)   |
| Na(1)-O(4)      | 2.460(4)   | Na(1)-N(2)       | 2.497(5)   |
| O(2)-Pb(1)-O(4) | 123.24(12) | Na(1)-Pb(1)-O(1) | 146.22(12) |
| N(1)-Pb(1)-O(4) | 80.24(14)  | O(1)-Pb(1)-O(3)  | 125.06(12) |

Symmetric code: -x, -y, -z.

**Table S3** Comparison of the selected materials in detective sensitivity for Fe<sup>3+</sup> ions

| Material                                                                                                                                                             | Sensitivity             | Reference           |
|----------------------------------------------------------------------------------------------------------------------------------------------------------------------|-------------------------|---------------------|
| Eu(acac) <sub>3</sub> @Zn(C <sub>15</sub> H <sub>12</sub> NO <sub>2</sub> ) <sub>2</sub>                                                                             | 5×10 <sup>-3</sup> M    | 1                   |
| Eu(C <sub>33</sub> H <sub>24</sub> O <sub>12</sub> )(H <sub>2</sub> NMe)(H <sub>2</sub> O)                                                                           | 2×10 <sup>-4</sup> M    | 2                   |
| Eu(C <sub>22</sub> H <sub>14</sub> O <sub>2</sub> ) <sub>3</sub>                                                                                                     | 10 <sup>-4</sup> M      | 3                   |
| [Eu(BTPCA)(H <sub>2</sub> O)]·2DMF·3H <sub>2</sub> O                                                                                                                 | 10 <sup>-5</sup> M      | 4                   |
| MIL-53(Al)                                                                                                                                                           | 0.9×10 <sup>-6</sup> M  | 5                   |
| {[LnCd <sub>2</sub> (DTPA) <sub>2</sub> (H <sub>2</sub> O) <sub>4</sub> ]·4H <sub>2</sub> O}                                                                         | 1.5×10 <sup>-5</sup> M  | 6                   |
| carbon nanoparticles (CNPs)                                                                                                                                          | 0.32×10 <sup>-6</sup> M | 7                   |
| Fluorescent Gold Nanoclusters                                                                                                                                        | 5.4×10 <sup>-6</sup> M  | 8                   |
| [Cd <sub>3</sub> (dpa)(DMF) <sub>2</sub> (H <sub>2</sub> O) <sub>3</sub> ]·DMF                                                                                       | 1.75×10 <sup>-4</sup> M | 9                   |
| Zn <sub>3</sub> L <sub>3</sub> (DMF) <sub>2</sub>                                                                                                                    | 10 <sup>-5</sup> M      | 10                  |
| [[Eu <sub>2</sub> (MFDA) <sub>2</sub> (HCOO) <sub>2</sub> (H <sub>2</sub> O) <sub>6</sub> ]·H <sub>2</sub> O                                                         | 1.0×10 <sup>-4</sup> M  | 11                  |
| [Tb <sub>4</sub> (OH) <sub>4</sub> (DSOA) <sub>2</sub> (H <sub>2</sub> O) <sub>8</sub> ]·(H <sub>2</sub> O) <sub>8</sub>                                             | 10 <sup>-6</sup> M      | 12                  |
| [H <sub>2</sub> N(Me) <sub>2</sub> ][Eu <sub>3</sub> (OH)(bpt) <sub>3</sub> (H <sub>2</sub> O) <sub>3</sub> ]<br>(DMF) <sub>2</sub> ·(H <sub>2</sub> O) <sub>4</sub> | 10 <sup>-5</sup> M      | 13                  |
| [Eu <sub>2</sub> (MFDA) <sub>2</sub> (HCOO) <sub>2</sub> (H <sub>2</sub> O) <sub>6</sub> ]·H <sub>2</sub> O                                                          | 10 <sup>-5</sup> M      | 14                  |
| TbL                                                                                                                                                                  | 10 <sup>-6</sup> M      | 15                  |
| [Eu(HL)(H <sub>2</sub> O <sub>2</sub> )]·2H <sub>2</sub> O                                                                                                           | 3.0×10 <sup>-4</sup> M  | 16                  |
| <b>1</b>                                                                                                                                                             | 2.1×10 <sup>-5</sup> M  | <i>In this work</i> |

**References:**



- [1] G. G. Hou, Y. Liu, Q. K. Liu, J. P. Ma and Y. B. Dong, *Chem. Commun.* 2011, **47**, 10731-10733.
- [2] S. Dang, E. Ma, Z.M. Sun and H. J. Zhang, *J. Mater. Chem.* 2012, **22**, 16920-16926.
- [3] M. Zheng, H. Q. Tan, Z. G. Xie, L. G. Zhang, X. B. Jing and Z. C. Sun, *ACS Appl. Mater. Interfaces*, 2013, **5**, 1078-1083.
- [4] Q. Tang, S. X. Liu, Y. W. Liu, J. Miao, S. J. Li, L. Zhang, Z. Shi and Z. P. Zheng, *Inorg. Chem.* 2013, **52**, 2799-2801.
- [5] C. X. Yang, H. B. Ren and X. P. Yan, *Anal. Chem.* 2013, **85**, 7441-7446.
- [6] Q. Liu, F. Wan, L. X. Qiu, Y. Q. Sun and Y. P. Chen, *RSC Adv.*, 2014, **4**, 27013-27021.
- [7] K. G. Qu, J. S. Wang, J. S. Ren and X. G. Qu, *Chem. Eur. J.* 2013, **19**, 7243-7249.
- [8] J.-A. A. Ho, H.-C. Chang and W.-T. Su, *Anal. Chem.* 2012, **84**, 3246-3253.
- [9] J. C. Jin, L. Y. Pang, G. P. Yang, L. Hou and Y. Y. Wang, *Dalton Trans.*, 2015, **44**, 17222-17228.
- [10] Z. C. Yu, F. Q. Wang, X. Y. Lin, C. M. Wang, Y. Y. Fu, X. J. Wang, Y. N. Zhao and G. D. Li, *J. Solid. State. Chem.*, 2015, **232**, 96-101.
- [11] X. H. Zhou, L. Li, H. H. Li, T. Yang and W. Huang, *Dalton Trans.*, 2013, **42**, 12403-12409.
- [12] X. Y. Dong, R. Wang, J. Z. Wang, S. Q. Zang and T. C. W. Mak, *J. Mater. Chem. A*, 2015, **3**, 641-647.
- [13] S. Xing, Q. Bing, L. Song, G. Li, J. Liu, Z. Shi, S. Feng and R. Xu, *Chem. – Eur. J.*, 2016, **22**, 16230-16235.
- [14] X. Zhou, L. Li, H. Li, A. Li, T. Yang and W. Huang, *Dalton Trans.*, 2013, **42**, 12403-12409.
- [15] S. Dang, T. Wang, F. Yi, Q. Liu, W. Yang and Z. Sun, *Chem. – Asian J.*, 2015, **10**, 1703-1709.
- [16] Y. Liang, G. Yang, B. Liu, Y. Yan, Z. Xi and Y. Wang, *Dalton Trans.*, 2015, **44**, 13325-13330.
